# Supplementary figures and images for: Comparative analysis of viral RNA signatures on different RIG-I-like receptors
Source: eLife journal article supplement (doi:10.7554/elife.11275), 2016-03-24

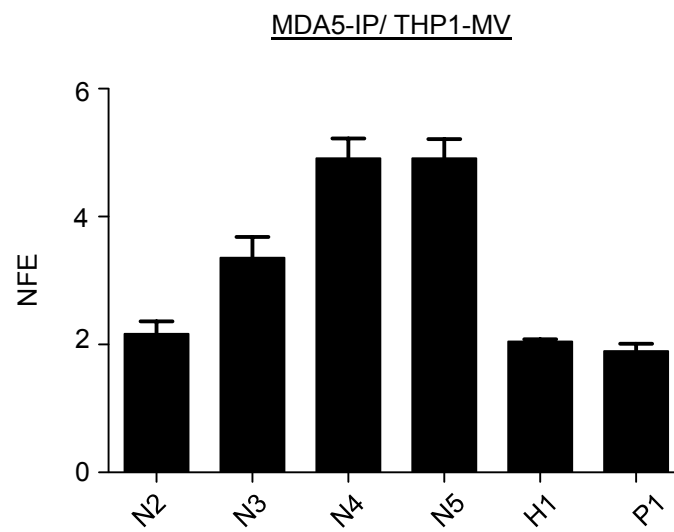

Sanchez David *et al.* **Figure 10- figure supplement 1.**

Supplement: supp [file elife_poa_e11275_Figure_10_figure_supplement_1.pdf › elife_poa_e11275_Figure_10_figure_supplement_1.pdf]

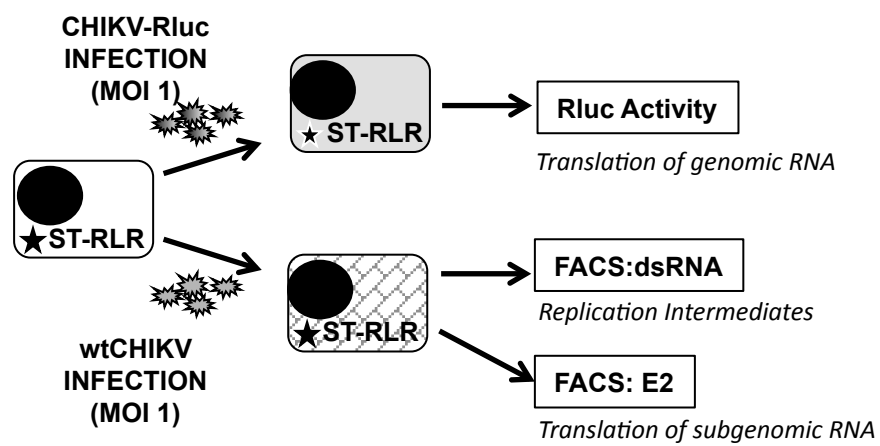

Sanchez David *et al.* **Figure 3 - figure supplement 1**

Supplement: supp [file elife_poa_e11275_Figure_3_figure_supplement_1.pdf › elife_poa_e11275_Figure_3_figure_supplement_1.pdf]

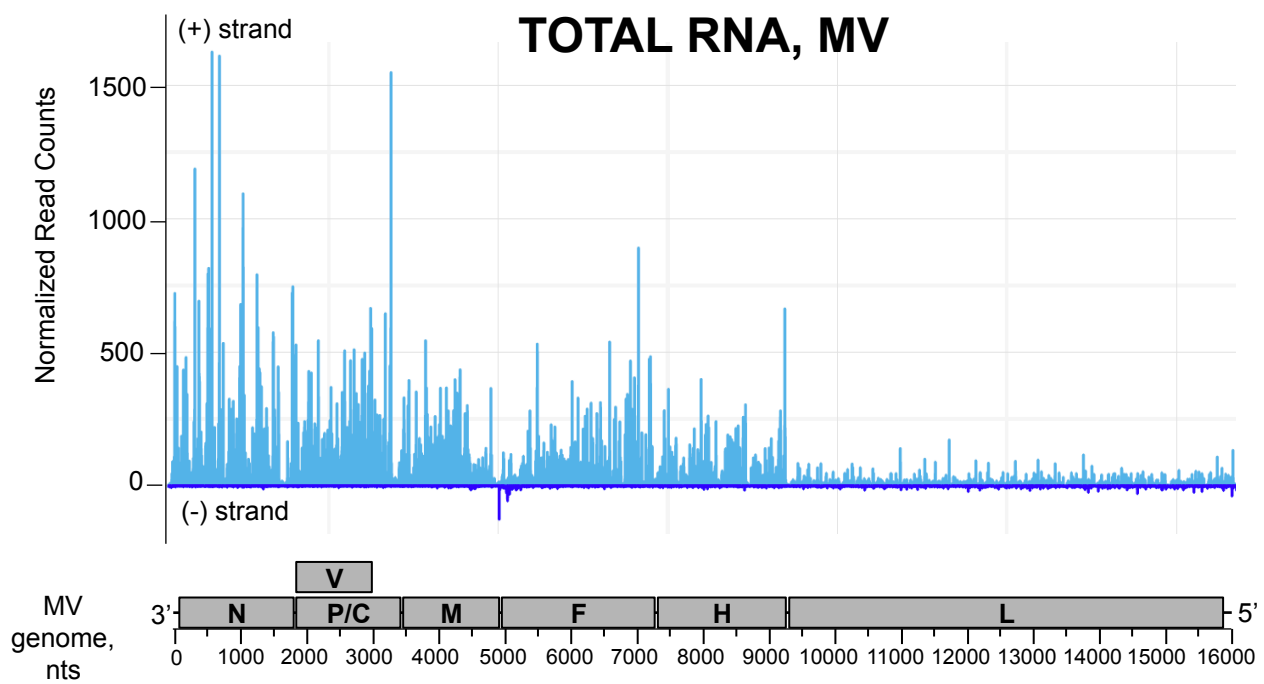

Sanchez David *et al.* **Figure 6- figure supplement 1.**

Supplement: supp [file elife_poa_e11275_Figure_6_figure_supplement_1.pdf › elife_poa_e11275_Figure_6_figure_supplement_1.pdf]

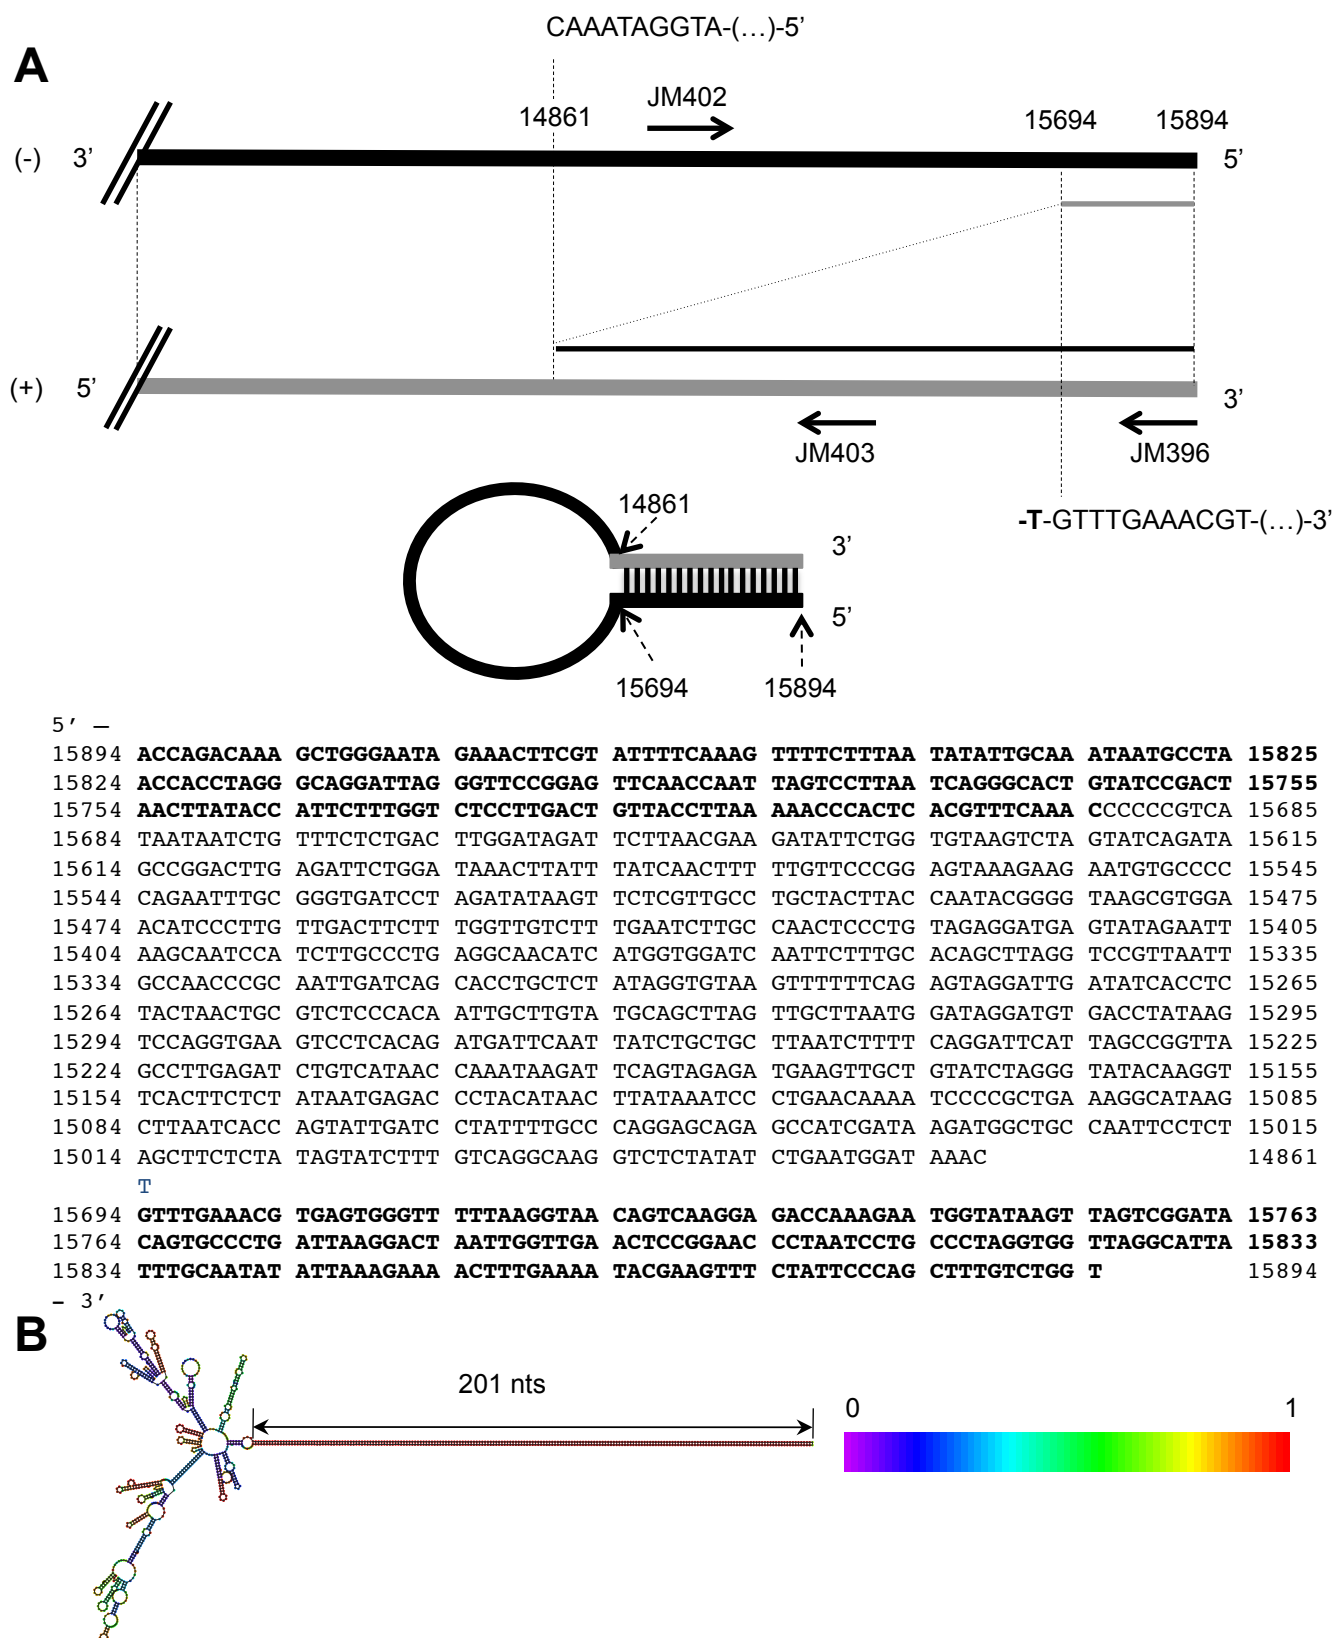

Sanchez David *et al.* Figure 7 - figure supplement 1.

Supplement: supp [file elife_poa_e11275_Figure_7_figure_supplement_1.pdf › elife_poa_e11275_Figure_7_figure_supplement_1.pdf]

**A**

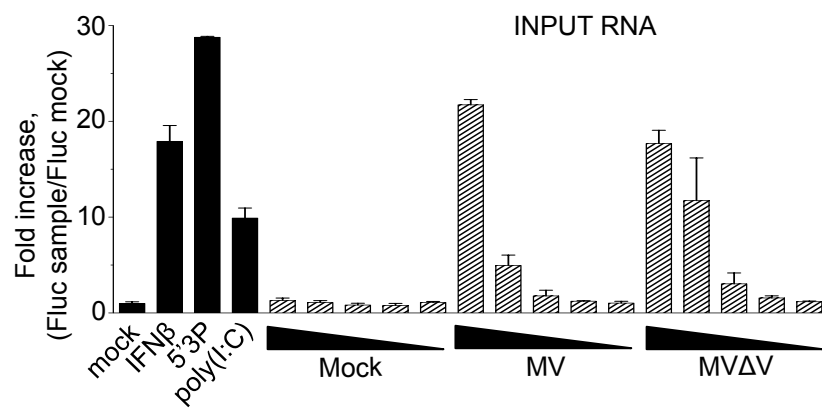

Sanchez David *et al.* **Figure 7 - figure supplement 2.**

Supplement: supp [file elife_poa_e11275_Figure_7_figure_supplement_2.pdf › elife_poa_e11275_Figure_7_figure_supplement_2.pdf]

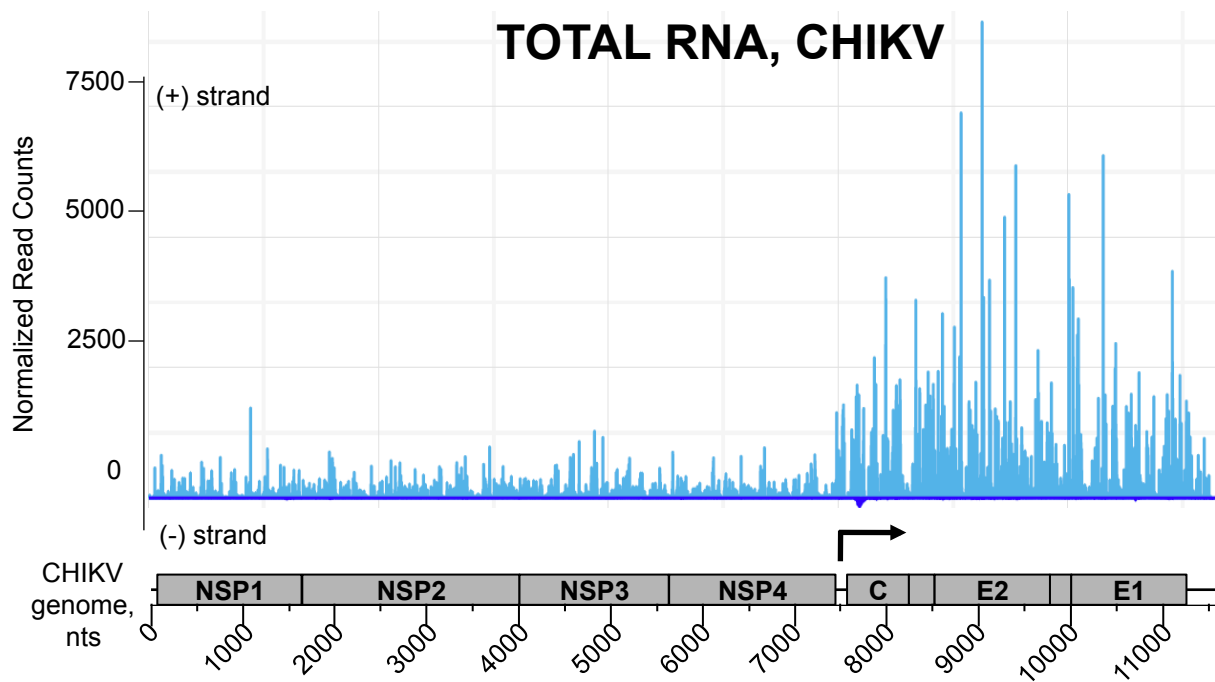

Sanchez David *et al.* **Figure 9- figure supplement 1**

Supplement: supp [file elife_poa_e11275_Figure_9_figure_supplement_1.pdf › elife_poa_e11275_Figure_9_figure_supplement_1.pdf]
